# Supplementary material
Source: PubMed Central journal article supplement (PMC3548950)

## **SUPPLEMENTAL MATERIAL**

## Online Methods:

### Cohorts and samples studied

*The Family Blood Pressure Program (FBPP)*, funded by the National Heart, Lung, and Blood Institute (NHBLI), is a large family-based sample of 17,129 subjects; each ascertained through a proband with clinical HTN or elevated BP. The aims were to identify genes influencing BP levels, HTN and its cardiovascular complications in Americans of European, African, Hispanic and Asian ancestry. The families were ascertained through four networks, GenNet, GENOA, HyperGEN and SAPHIRE, and included European American (EA), African American (AA), Hispanic (HA) and Asian American (AsA) subjects. The FBPP study includes data on over 200 BP and HTN relevant variables by collecting data on 17,129 individuals through 21,600 physical examinations and blood samples. SBP and DBP were measured using an automated oscillometric BP measurement device with a consistent protocol across networks while PP and MAP were calculated as  $PP=SBP-DBP$  and  $MAP=(2DBP+SBP)/3$ . Samples with missing SBP, DBP, BMI, gender or age were not included in this analysis.

*The CLUE study* includes 2 large cohorts of volunteers from Washington County in Maryland, who were ascertained and sampled in 1974 and 1989 by the George W. Comstock Center for Public Health Research and Prevention in Hagerstown, Maryland, and was funded by the National Cancer Institute. CLUE I (Campaign Against Cancer and Stroke, 1974) included 26,147 participants (23,951 of whom were local residents). Fifteen mL of blood was drawn from each individual along with information on health history and BP. CLUE II (Campaign Against Cancer and Heart Disease, 1989) was an expansion of CLUE I with some participant overlap. Twenty mL of blood was collected from 32,894 individuals (25,076 were local residents) with a brief health history and an extended questionnaire. About 30% of adult residents of Washington County, MD participated in the study. The Odyssey cohort consisted of 8,394 individuals who participated in both CLUE I and II. SBP and DBP were measured by mercury filled sphygmomanometers, with a subset of 384 Odyssey samples measured by aneroid sphygmomanometers; PP and MAP were calculated as in the FBPP study. Samples with missing SBP, DBP, BMI, gender or age were not included in the analysis.

*ARIC (Atherosclerosis Risk In Communities) study* is a population-based, prospective-cohort cardiovascular disease study of 15,792 persons aged 45-64 years at baseline (1987-89) randomly chosen from four US communities: Forsyth County, NC (12% African American (AA)); Jackson, MI (100% AA); suburban Minneapolis, MN (<1% AA); and Washington County, MD (<1% AA). Cohort members completed four clinic examinations in 1987-89, 1990-92, 1993-95, and 1996-98 with data on health status, selected risk factors, family medical history, employment, educational status, diet and physical activity; a blood sample of over 20 mL was also collected. Sitting SBP/DBP was measured with a random zero sphygmomanometer while PP and MAP were calculated as in the FBPP. Samples with missing SBP, DBP, BMI, gender or age were not included in the analysis.

DNA sequencing of PCR products using bidirectional dideoxy Sanger chemistry was supported by the RS&G (Resequencing and Genotyping Service) program

(<http://rsng.nhlbi.nih.gov/scripts/index.cfm>) of the NHLBI and was performed at the J. Craig Venter Institute, Rockville, MD (JCVI, who sequenced *HSD11B2*, *NR3C2*, *SCNN1A*, *SCNN1B*, *SCNN1G*, and *WNK1*) and at the University of Washington, Seattle, WA (UW, who sequenced *AGT*, *CYP11B1*, *CYP17A1*, *NR3C1* and *WNK4*).

**DNA sequencing protocol:**

Briefly, 5'-M13 tailed-gene specific PCR primers were designed to cover the target region with amplicon size ranging from 350-800 bp and with a minimum of 100 bp overlap between adjacent amplicons, resulting in double-stranded coverage of all targeted regions. Overlapping amplicons were used to validate gene-specific primer sequences in independent experiments and rule out the possibility of allele-specific PCR amplification. All primer sequences were compared to the whole genome assembly to verify uniqueness against pseudogenes and gene families. Designed amplicons were separated into two categories based on their calculated melting temperatures ( $T_m$ ). Standard GC content and high GC content amplicons were processed separately (at JCVI) and following temperature gradient optimization of small-scale reactions to determine optimal thermal cycling conditions (at UW).

*JCVI protocols:* PCR amplifications were performed in 384-well plates in a volume of 10 $\mu$ L. The standard GC content PCR protocol was comprised of 3.0 $\mu$ L of 0.4 $\mu$ M mixed forward and reverse primers, 3.0 $\mu$ L of DNA (1.67ng/ $\mu$ L) and 0.05 $\mu$ L (0.25 units) of AmpliTaq Gold® DNA polymerase (Applied Biosystems). The high GC PCR protocol was comprised of 3.0 $\mu$ L of 1.2 $\mu$ M mixed forward and reverse primers, 3.0 $\mu$ L of DNA (10.0ng/ $\mu$ L) and 0.075 $\mu$ L (0.375 units) of AmpliTaq Gold® DNA polymerase (Applied Biosystems). All PCR amplifications were performed on dual 384-well GeneAmp® PCR System 9700 thermal cyclers (Applied Biosystems) under the following program: 96°C for 5 minutes (1X); 94°C for 30 seconds, 60°C for 45 seconds, 72°C for 45 seconds (40X); 72°C for 10 minutes (1X); 10°C final hold. PCR products were cleaned using Shrimp Alkaline Phosphatase and Exonuclease I (SAP/Exo mix) (USB Corporation) by adding 5.0 $\mu$ L of SAP/Exo mix directly to the 10 $\mu$ L volume PCR products in 384-well plates. For standard GC PCR products the SAP/Exo mix was comprised of 0.5 $\mu$ L of SAP (1 unit) and 0.1 $\mu$ L of exonuclease I (0.5 unit). For high GC PCR products the SAP/Exo mix was comprised of 0.5 $\mu$ L of SAP (1 unit) and 0.175 $\mu$ L of exonuclease I (1.76 units). Using dual 384-well GeneAmp® PCR System 9700 thermal cyclers (Applied Biosystems), digestions were carried out at two temperatures, 37°C followed by 47°C (standard reaction) or 50°C (high GC reaction), with a final heat inactivation step at 72°C.

Bi-directional sequencing reactions were performed in 384-well plates using a 1/64th BigDye™ Terminator v3.1 chemistry (Applied Biosystems) and 1.5 $\mu$ L of cleaned PCR products in dual 384-well GeneAmp® PCR System 9700 thermal cyclers (Applied Biosystems). Reaction products were precipitated using a sodium acetate/ethanol mixture followed by a final ethanol rinse and air-drying. Beckman-Coulter FX robots and Cartesian Technologies Pixsys 4200 nanoliter liquid handling systems were employed in setting up PCR, PCR clean-up, sequencing reactions and precipitation. Immediately before sequencing, the precipitated sequencing reactions were

resuspended in 10.0µL of 0.75mM EDTA using a µFill™ (Bio-Tek™ Instruments) and shaken using a Microplate Shaker (Union Scientific™ Corporation). Chromatograms were generated from sequence reaction on an Applied Biosystems ABI 3730XL capillary sequencer. Data flow was tracked by using a custom-designed LIMS system.

*UW protocols:* Production level PCR amplifications were performed in 96-well plates in a volume of 7 µl comprising 0.2 µl each of 7 µM forward and reverse primers, 2.8 µl DNA (5 ng/µl), and 0.4 µl Elongase Enzyme (Invitrogen) or iProof polymerase (Bio-Rad) per well. Following evaluation by 1% agarose gel electrophoresis, reactions were diluted four to six fold in ddH<sub>2</sub>O. Dilution of the products eliminated the need for any purification of the PCR products prior to sequencing.

Sequencing reactions were performed in MJ Tetrad PTC 225 thermal cyclers in 384-well format by using 5% BDT v3.1 sequencing chemistry (ABI). Reaction products were precipitated in ethanol with CleanSeq magnetic beads (Agencourt). Perkin Elmer Minitrak, Multiprobe, and Evolution P3 robots were used to automate liquid handling in the setup of PCR, sequencing reactions and precipitation reactions. Reaction products were air dried and diluted to 30 µl with ddH<sub>2</sub>O. Chromatograms were generated from sequence reaction on an Applied Biosystems ABI 3730XL capillary sequencer. Data flow was tracked by using a custom-designed LIMS system.

#### **Variant discovery and analysis:**

All chromatograms were initially base- and quality-called by using ABI KB (on 3730xl sequencer), filtered using DSPTrace software, base- and quality-called by TraceTuner with custom calibration for 3730xl at JCVI, while all chromatograms were based-called by using Phred. They were then assembled into contigs by using Phrap and scanned for SNP and INDELS with JCVI Resequencing Analysis software and by PolyPhred, version 6.02 [1] to identify polymorphic sites. Data quality was monitored and assessed at multiple production checkpoints using numerous methods, such as removing low-quality sequence (Phred score < 30), and low signal-to-noise ratio sequences (SNR < 20), resulting in reads averaging > 450 bp with an average Phred score of 40. Following all assembly of all chromatograms onto an initial reference sequence putative polymorphic sites were selectively reviewed by sequencing analysts using Consed [2]. Individual polymorphic sites in regions with lower quality data, ambiguous base calls, deviations from Hardy-Weinberg equilibrium or those identified using laboratory quality control tools were reviewed to eliminate potential false positive positions. Variations were formatted and submitted to dbSNP for assignment of ss and rs identification numbers.

#### **Sequence quality**

In order to assess sequence quality we computed sequencing accuracy using 4 duplicated samples and base calls in the overlapping amplicons. On comparing the DNA sequences of the 4 individuals who were sequenced in duplicate, 303 differences were detected from a total of 479,995bp (error rate of 0.063% per sample). On comparing the base calls in all overlapping reads, 16,021 differences were detected

from a total of 6,673,015bp (estimated error rate of 0.24% per sample). Thus, overall data quality is very high.

### **Genotyping methods**

The Sequenom pool genotyping primers were tested for their genotyping accuracy on 179 HapMap and known variant allele carriers in the respective FBPP samples. For each reaction pool, we used ~10-20ng of genomic DNA per sample and followed the Sequenom standard protocol. We used a Tecan Genesis liquid handler and Tecan Gemini software (Tecan Trading AG, Switzerland) to make 384-well DNA template and dispense PCR master mix into each well. We genotyped rs2681472 (*ATP2B1*) using Taqman technology and a pre-designed SNP assay from Applied Biosystems Inc. (Foster City, CA). For this assay, we used ~5-10ng of genomic DNA per sample following a standard protocol for 384-well plate reactions.

Genotypes were called using the automated Sequenom and Taqman software (TYPER Suite 4.0.2.0 and SDS 2.2p1). We manually called genotypes whenever the software failed to process the intensity signals automatically. Based on replicate samples, and by comparing our genotypes for 179 HapMap samples with those in the HapMap Project, we obtained a concordance rate >99.9%. Samples with <90% completeness of genotypes and variants with <90% completeness of samples were excluded from further analysis.

### **Supplemental References for Methods:**

- 1 Stephens M, Sloan JS, Robertson PD, Scheet P, Nickerson DA. Automating sequence-based detection and genotyping of SNPs from diploid samples. *Nat. Genet.* 2006;38:1457-1462.
- 2 Gordon D, Abagian C, Green P. Consed: a graphical tool for sequence finishing. *Genome Res.* 1998;8:195-202.

## Online Table Legends:

**Online Table I:** Hypertension genes selected for resequencing. For each gene, we include the chromosomal position (hg19), the nature and inheritance of known disease mutations, and the associated hypertension/blood pressure trait phenotypes. (<sup>a</sup>LOF/GOF: loss/gain of function; <sup>b</sup>AR/AD: autosomal recessive/dominant; <sup>c</sup>AH: Adrenal Hyperplasia, AME: Apparent Mineralocorticoid Excess; EH: Essential Hypertension, GR: Glucocorticoid Receptor deficiency, LS: Liddle Syndrome, PHA: Pseudo-hypoaldosteronism, EO: Early Onset hypertension with severe exacerbation in pregnancy; RTD: Renal Tubular Dysgenesis.)

**Online Table II:** List of all known disease causing coding mutations from the Human Gene Mutation Database (HGMD) at the 11 genes selected for resequencing.

**Online Table III:** Summary of demographic and phenotypic information for ARIC, CLUE and FBPP samples. For each study we provide sample size, % female, % hypertensive, % medicated, observed BP values and residuals after correction for covariates (see Methods) for individuals by European (EA) and African (AA) ancestry.

**Online Table IV:** Genetic association results of pooled non-coding variants by gene and population. The numbers of variants (k) are provided; P-values with  $FDR \leq 0.05$  are highlighted in yellow.

**Online Table V:** Genetic association results of 6 imputed *CYP17A1* variants for SBP LTA in ARIC EAs; chromosomal position, rsID, alleles (A1, A2), MAF, effect size in mmHg, standard error (SE) and corresponding P-values are shown. All entries with  $FDR \leq 0.05$  are highlighted in yellow.

**Online Table VI:** Complete genetic association results of 27 replicated GWAS variants in CLUE and FBPP samples; chromosomal position, rsID, minor allele, MAF and corresponding P-values are shown. All entries with  $FDR \leq 0.05$  are highlighted in yellow.

**Online Table VII:** Complete genetic association results of 11 rare deleterious variants in CLUE and FBPP samples; chromosomal position, rsID, minor allele, MAF and corresponding P-values are shown. All entries with  $FDR \leq 0.05$  are highlighted in yellow.

**Online Table VIII:** Power calculations. Statistical power is shown as a function of the variant allele frequency (MAF), the variants' effect on blood pressure in standard deviation units ( $\sigma$ ) and sample size. All power values  $< 10\%$  are designated by \* and values above 80% are highlighted in yellow.

**Online Table IX:** List of 12 disease causing HGMD mutations in 69 of the total of 560 GenNet individuals. For each variant, we provide the corresponding chromosomal location, reference and alternate alleles (A1/A2) and residues (Res1/Res2), strand, rsID, minor allele frequency in EA and AA, phyloP score and disease association. Note that all variants are non-synonymous except one exonic splicing variant marked as \*.

**Online Table X:** Allelic effects of variants in 5 mutation classes; for each class, the number of variants found in studied cohorts (# variants), number of variants in each class that are found in EVS (# in EVS), median absolute effect size of variant's residuals and standard error (average across all individuals with the rare alleles,  $\tau$  and  $SE_{\tau}$ ),  $\tau$  value and standard error in mmHg ( $\tau_{\text{mmHg}}$   $SE_{\text{mmHg}}$ ), median minor allele frequency when found in EVS (q) and other wise (!) are provided.

Online Table I.

| <i>Gene Name</i> | <i>Chromosomal Position (hg19)</i> | <i>Mutation type<sup>a</sup></i> | <i>Mode of Inheritance<sup>b</sup></i> | <i>Associated Disease<sup>c</sup></i> | <i>Trait</i>        |
|------------------|------------------------------------|----------------------------------|----------------------------------------|---------------------------------------|---------------------|
| <i>AGT</i>       | chr1:230,836,298-230,851,926       | LOF                              | AR                                     | EH, RTD                               | Hypo + Hypertension |
| <i>CYP11B1</i>   | chr8:143,951,810-143,961,548       | LOF                              | AR                                     | AH IV                                 | Hypertension        |
| <i>CYP17A1</i>   | chr10:104,590,010-104,597,876      | LOF                              | AR                                     | AH V                                  | Hypertension        |
| <i>HSD11B2</i>   | chr16:67,462,017-67,474,452        | LOF                              | AR                                     | AME                                   | Hypertension        |
| <i>NR3C1</i>     | chr5:142,655,537-142,817,077       | LOF                              | AD                                     | GR                                    | Hypertension        |
| <i>NR3C2</i>     | chr4:148,996,918-149,366,699       | LOF/GOF                          | AD                                     | PHA I/EO                              | Hypo/Hypertension   |
| <i>SCNN1A</i>    | chr12:6,453,015-6,487,715          | LOF                              | AR                                     | PHA I                                 | Hypertension        |
| <i>SCNN1B</i>    | chr16:23,310,632-23,395,619        | GOF/LOF                          | AD/AR                                  | LS/PHA I                              | Hyper/Hypotension   |
| <i>SCNN1G</i>    | chr16:23,191,040-23,231,200        | GOF/LOF                          | AD/AR                                  | LS/PHA I                              | Hypertension        |
| <i>WNK1</i>      | chr12:859,732-1,020,958            | GOF                              | AD                                     | PHA II                                | Hypertension        |
| <i>WNK4</i>      | chr17:40,930,733-40,951,031        | LOF                              | AD                                     | PHA II                                | Hypertension        |



Online Table II.

| <i>chr</i> | <i>bp</i> | <i>A1</i> | <i>A2</i> | <i>strand</i> | <i>dbSNP</i> | <i>HGVS_cdna</i>      | <i>HGVS_protein</i> | <i>gene</i>    | <i>disease</i>                              |
|------------|-----------|-----------|-----------|---------------|--------------|-----------------------|---------------------|----------------|---------------------------------------------|
| 1          | 230841679 | C         | T         | -             | NA           | NM_000029.3:c.1124G-A | NP_000020.1:p.R375Q | <i>AGT</i>     | Renal tubular dysgenesis                    |
| 1          | 230845755 | T         | C         | -             | rs56073403   | NM_000029.3:c.842A-G  | NP_000020.1:p.Y281C | <i>AGT</i>     | Hypertension                                |
| 1          | 230845866 | A         | C         | -             | rs5041       | NM_000029.3:c.731T-G  | NP_000020.1:p.L244R | <i>AGT</i>     | Hypertension                                |
| 1          | 230845872 | G         | A         | -             | NA           | NM_000029.3:c.725C-T  | NP_000020.1:p.T242I | <i>AGT</i>     | Hypertension                                |
| 1          | 230845993 | G         | A         | -             | NA           | NM_000029.3:c.604C-T  | NP_000020.1:p.Q202X | <i>AGT</i>     | Renal tubular dysgenesis                    |
| 1          | 230846470 | G         | A         | -             | rs41271499   | NM_000029.3:c.127C-T  | NP_000020.1:p.L43F  | <i>AGT</i>     | Preeclampsia                                |
| 10         | 104590499 | C         | T         | -             | NA           | NM_000102.3:c.1487G-A | NP_000093.1:p.R496H | <i>CYP17A1</i> | 17,20-lyase deficiency                      |
| 10         | 104590500 | G         | A         | -             | NA           | NM_000102.3:c.1486C-T | NP_000093.1:p.R496C | <i>CYP17A1</i> | Steroid-17 alpha-hydroxylase deficiency     |
| 10         | 104590592 | A         | G         | -             | NA           | NM_000102.3:c.1394T-C | NP_000093.1:p.L465P | <i>CYP17A1</i> | Steroid-17 alpha-hydroxylase deficiency     |
| 10         | 104590605 | G         | A         | -             | NA           | NM_000102.3:c.1381C-T | NP_000093.1:p.Q461X | <i>CYP17A1</i> | Steroid-17 alpha-hydroxylase deficiency     |
| 10         | 104590628 | A         | G         | -             | NA           | NM_000102.3:c.1358T-C | NP_000093.1:p.F453S | <i>CYP17A1</i> | 17-alpha-hydroxylase/17,20-lyase deficiency |
| 10         | 104590641 | G         | A         | -             | NA           | NM_000102.3:c.1345C-T | NP_000093.1:p.R449C | <i>CYP17A1</i> | 17-alpha-hydroxylase/17,20-lyase deficiency |
| 10         | 104590662 | A         | G         | -             | NA           | NM_000102.3:c.1324T-C | NP_000093.1:p.C442R | <i>CYP17A1</i> | 17-alpha-hydroxylase/17,20-lyase deficiency |
| 10         | 104590667 | C         | T         | -             | NA           | NM_000102.3:c.1319G-A | NP_000093.1:p.R440H | <i>CYP17A1</i> | Steroid-17 alpha-hydroxylase deficiency     |
| 10         | 104590668 | G         | A         | -             | NA           | NM_000102.3:c.1318C-T | NP_000093.1:p.R440C | <i>CYP17A1</i> | Steroid-17 alpha-hydroxylase deficiency     |
| 10         | 104590685 | G         | A         | -             | NA           | NM_000102.3:c.1301C-T | NP_000093.1:p.P434L | <i>CYP17A1</i> | 17-alpha-hydroxylase/17,20-lyase deficiency |
| 10         | 104590703 | G         | A         | -             | NA           | NM_000102.3:c.1283C-T | NP_000093.1:p.P428L | <i>CYP17A1</i> | 17-alpha-hydroxylase/17,20-lyase deficiency |
| 10         | 104590736 | A         | C         | -             | NA           | NM_000102.3:c.1250T-G | NP_000093.1:p.F417C | <i>CYP17A1</i> | 17,20-lyase deficiency                      |
| 10         | 104590739 | C         | T         | -             | NA           | NM_000102.3:c.1247G-A | NP_000093.1:p.R416H | <i>CYP17A1</i> | Steroid-17 alpha-hydroxylase deficiency     |
| 10         | 104590740 | G         | A         | -             | NA           | NM_000102.3:c.1246C-T | NP_000093.1:p.R416C | <i>CYP17A1</i> | Steroid-17 alpha-hydroxylase deficiency     |
| 10         | 104591282 | G         | C         | -             | NA           | NM_000102.3:c.1226C-G | NP_000093.1:p.P409R | <i>CYP17A1</i> | Steroid-17 alpha-hydroxylase deficiency     |
| 10         | 104591292 | A         | G         | -             | NA           | NM_000102.3:c.1216T-C | NP_000093.1:p.W406R | <i>CYP17A1</i> | Steroid-17 alpha-hydroxylase deficiency     |
| 10         | 104591315 | G         | A         | -             | NA           | NM_000102.3:c.1193C-T | NP_000093.1:p.A398V | <i>CYP17A1</i> | 17-alpha-hydroxylase/17,20-lyase deficiency |
| 10         | 104591346 | T         | A         | -             | NA           | NM_000102.3:c.1162A-T | NP_000093.1:p.K388X | <i>CYP17A1</i> | 17-alpha-hydroxylase/17,20-lyase deficiency |
| 10         | 104592289 | T         | A         | -             | NA           | NM_000102.3:c.1118A-T | NP_000093.1:p.H373L | <i>CYP17A1</i> | Steroid-17 alpha-hydroxylase deficiency     |
| 10         | 104592290 | G         | C         | -             | NA           | NM_000102.3:c.1117C-G | NP_000093.1:p.H373D | <i>CYP17A1</i> | 17-alpha-hydroxylase/17,20-lyase            |

|    |           |   |   |   |            |                       |                     |                |                                                           |
|----|-----------|---|---|---|------------|-----------------------|---------------------|----------------|-----------------------------------------------------------|
| 10 | 104592290 | G | T | - | NA         | NM_000102.3:c.1117C-A | NP_000093.1:p.H373N | <i>CYP17A1</i> | deficiency<br>17-alpha-hydroxylase/17,20-lyase deficiency |
| 10 | 104592322 | C | T | - | NA         | NM_000102.3:c.1085G-A | NP_000093.1:p.R362H | <i>CYP17A1</i> | 17-alpha-hydroxylase/17,20-lyase deficiency               |
| 10 | 104592323 | G | A | - | NA         | NM_000102.3:c.1084C-T | NP_000093.1:p.R362C | <i>CYP17A1</i> | Steroid-17 alpha-hydroxylase deficiency                   |
| 10 | 104592334 | C | T | - | NA         | NM_000102.3:c.1073G-A | NP_000093.1:p.R358Q | <i>CYP17A1</i> | Steroid-17 alpha-hydroxylase deficiency                   |
| 10 | 104592335 | G | A | - | NA         | NM_000102.3:c.1072C-T | NP_000093.1:p.R358X | <i>CYP17A1</i> | 17-alpha-hydroxylase/17,20-lyase deficiency               |
| 10 | 104592344 | C | T | - | NA         | NM_000102.3:c.1063G-A | NP_000093.1:p.A355T | <i>CYP17A1</i> | 17-alpha-hydroxylase/17,20-lyase deficiency               |
| 10 | 104592367 | C | T | - | rs61754278 | NM_000102.3:c.1040G-A | NP_000093.1:p.R347H | <i>CYP17A1</i> | Steroid-17 alpha-hydroxylase deficiency                   |
| 10 | 104592368 | G | A | - | NA         | NM_000102.3:c.1039C-T | NP_000093.1:p.R347C | <i>CYP17A1</i> | 17,20-lyase deficiency                                    |
| 10 | 104592383 | G | T | - | NA         | NM_000102.3:c.1024C-A | NP_000093.1:p.P342T | <i>CYP17A1</i> | Pseudohermaphroditism                                     |
| 10 | 104592412 | A | G | - | NA         | NM_000102.3:c.995T-C  | NP_000093.1:p.I332T | <i>CYP17A1</i> | 17-alpha-hydroxylase/17,20-lyase deficiency               |
| 10 | 104592420 | G | C | - | NA         | NM_000102.3:c.987C-G  | NP_000093.1:p.Y329X | <i>CYP17A1</i> | Steroid-17 alpha-hydroxylase deficiency                   |
| 10 | 104592422 | A | C | - | NA         | NM_000102.3:c.985T-G  | NP_000093.1:p.Y329D | <i>CYP17A1</i> | Steroid-17 alpha-hydroxylase deficiency                   |
| 10 | 104592805 | T | C | - | NA         | NM_000102.3:c.914A-G  | NP_000093.1:p.E305G | <i>CYP17A1</i> | 17,20-lyase deficiency                                    |
| 10 | 104592815 | C | G | - | NA         | NM_000102.3:c.904G-C  | NP_000093.1:p.A302P | <i>CYP17A1</i> | Steroid-17 alpha-hydroxylase deficiency                   |
| 10 | 104592856 | G | T | - | NA         | NM_000102.3:c.863C-A  | NP_000093.1:p.S288X | <i>CYP17A1</i> | Steroid-17 alpha-hydroxylase deficiency                   |
| 10 | 104593830 | C | T | - | NA         | NM_000102.3:c.716G-A  | NP_000093.1:p.R239Q | <i>CYP17A1</i> | Steroid-17 alpha-hydroxylase deficiency                   |
| 10 | 104593831 | G | A | - | NA         | NM_000102.3:c.715C-T  | NP_000093.1:p.R239X | <i>CYP17A1</i> | Pseudohermaphroditism                                     |
| 10 | 104593863 | G | A | - | NA         | NM_000102.3:c.683C-T  | NP_000093.1:p.T228I | <i>CYP17A1</i> | Steroid-17 alpha-hydroxylase deficiency<br>?              |
| 10 | 104594582 | A | G | - | NA         | NM_000102.3:c.626T-C  | NP_000093.1:p.L209P | <i>CYP17A1</i> | 17-alpha-hydroxylase/17,20-lyase deficiency               |
| 10 | 104594607 | A | T | - | NA         | NM_000102.3:c.601T-A  | NP_000093.1:p.Y201N | <i>CYP17A1</i> | 17-alpha-hydroxylase/17,20-lyase deficiency               |
| 10 | 104594628 | C | A | - | NA         | NM_000102.3:c.580G-T  | NP_000093.1:p.E194X | <i>CYP17A1</i> | Steroid-17 alpha-hydroxylase deficiency                   |
| 10 | 104594675 | A | T | - | NA         | NM_000102.3:c.533T-A  | NP_000093.1:p.V178D | <i>CYP17A1</i> | Steroid-17 alpha-hydroxylase deficiency                   |
| 10 | 104594679 | T | C | - | NA         | NM_000102.3:c.529A-G  | NP_000093.1:p.N177D | <i>CYP17A1</i> | 17,20-lyase deficiency                                    |
| 10 | 104594687 | G | T | - | NA         | NM_000102.3:c.521C-A  | NP_000093.1:p.A174E | <i>CYP17A1</i> | Steroid-17 alpha-hydroxylase deficiency                   |
| 10 | 104595073 | C | T | - | NA         | NM_000102.3:c.374G-A  | NP_000093.1:p.R125Q | <i>CYP17A1</i> | Steroid-17 alpha-hydroxylase deficiency                   |
| 10 | 104595074 | G | A | - | NA         | NM_000102.3:c.373C-T  | NP_000093.1:p.R125X | <i>CYP17A1</i> | 17-alpha-hydroxylase/17,20-lyase deficiency               |
| 10 | 104595100 | T | A | - | NA         | NM_000102.3:c.347A-T  | NP_000093.1:p.D116V | <i>CYP17A1</i> | 17-alpha-hydroxylase/17,20-lyase deficiency               |

|    |           |   |   |   |            |                       |                     |                |                                             |
|----|-----------|---|---|---|------------|-----------------------|---------------------|----------------|---------------------------------------------|
| 10 | 104595107 | A | C | - | NA         | NM_000102.3:c.340T-G  | NP_000093.1:p.F114V | <i>CYP17A1</i> | 17-alpha-hydroxylase/17,20-lyase deficiency |
| 10 | 104595116 | C | T | - | NA         | NM_000102.3:c.331G-A  | NP_000093.1:p.G111S | <i>CYP17A1</i> | 17-alpha-hydroxylase/17,20-lyase deficiency |
| 10 | 104595119 | T | A | - | NA         | NM_000102.3:c.328A-T  | NP_000093.1:p.K110X | <i>CYP17A1</i> | 17-alpha-hydroxylase/17,20-lyase deficiency |
| 10 | 104595131 | A | G | - | NA         | NM_000102.3:c.316T-C  | NP_000093.1:p.S106P | <i>CYP17A1</i> | Steroid-17 alpha-hydroxylase deficiency     |
| 10 | 104596832 | C | T | - | NA         | NM_000102.3:c.287G-A  | NP_000093.1:p.R96Q  | <i>CYP17A1</i> | 17-alpha-hydroxylase/17,20-lyase deficiency |
| 10 | 104596833 | G | A | - | NA         | NM_000102.3:c.286C-T  | NP_000093.1:p.R96W  | <i>CYP17A1</i> | 17-alpha-hydroxylase/17,20-lyase deficiency |
| 10 | 104596841 | A | C | - | NA         | NM_000102.3:c.278T-G  | NP_000093.1:p.F93C  | <i>CYP17A1</i> | 17-alpha-hydroxylase/17,20-lyase deficiency |
| 10 | 104596850 | C | T | - | NA         | NM_000102.3:c.269G-A  | NP_000093.1:p.G90D  | <i>CYP17A1</i> | Steroid-17 alpha-hydroxylase deficiency     |
| 10 | 104596874 | G | T | - | NA         | NM_000102.3:c.245C-A  | NP_000093.1:p.A82D  | <i>CYP17A1</i> | 17-alpha-hydroxylase/17,20-lyase deficiency |
| 10 | 104596928 | T | G | - | NA         | NM_000102.3:c.191A-C  | NP_000093.1:p.Y64S  | <i>CYP17A1</i> | 17-alpha-hydroxylase/17,20-lyase deficiency |
| 10 | 104597038 | G | T | - | NA         | NM_000102.3:c.81C-A   | NP_000093.1:p.Y27X  | <i>CYP17A1</i> | 17-alpha-hydroxylase/17,20-lyase deficiency |
| 10 | 104597057 | C | T | - | rs61754263 | NM_000102.3:c.62G-A   | NP_000093.1:p.R21K  | <i>CYP17A1</i> | 17-alpha-hydroxylase/17,20-lyase deficiency |
| 10 | 104597068 | C | T | - | NA         | NM_000102.3:c.51G-A   | NP_000093.1:p.W17X  | <i>CYP17A1</i> | Steroid-17 alpha-hydroxylase deficiency     |
| 10 | 104597116 | C | G | - | NA         | NM_000102.3:c.3G-C    | NP_000093.1:p.M1I   | <i>CYP17A1</i> | Steroid-17 alpha-hydroxylase deficiency     |
| 10 | 104597117 | A | G | - | NA         | NM_000102.3:c.2T-C    | NP_000093.1:p.M1T   | <i>CYP17A1</i> | Steroid-17 alpha-hydroxylase deficiency     |
| 12 | 6457364   | G | A | - | NA         | NM_001038.5:c.1685C-T | NP_001029.1:p.S562L | <i>SCNN1A</i>  | Pseudohypoaldosteronism 1                   |
| 12 | 6458147   | G | A | - | NA         | NM_001038.5:c.1522C-T | NP_001029.1:p.R508X | <i>SCNN1A</i>  | Pseudohypoaldosteronism 1                   |
| 12 | 6458353   | G | A | - | NA         | NM_001038.5:c.1474C-T | NP_001029.1:p.R492X | <i>SCNN1A</i>  | Pseudohypoaldosteronism 1                   |
| 12 | 6458548   | C | T | - | NA         | NM_001038.5:c.1384G-A | NP_001029.1:p.V462I | <i>SCNN1A</i>  | Bronchiectasis                              |
| 12 | 6464943   | C | A | - | NA         | NM_001038.5:c.979G-T  | NP_001029.1:p.G327C | <i>SCNN1A</i>  | Pseudohypoaldosteronism 1                   |
| 12 | 6471365   | A | G | - | NA         | NM_001038.5:c.727T-C  | NP_001029.1:p.S243P | <i>SCNN1A</i>  | Pseudohypoaldosteronism 1                   |
| 12 | 6472752   | G | A | - | rs55797039 | NM_001038.5:c.541C-T  | NP_001029.1:p.R181W | <i>SCNN1A</i>  | Cystic fibrosis, non-classic                |
| 12 | 6483552   | C | T | - | NA         | NM_001038.5:c.398G-A  | NP_001029.1:p.C133Y | <i>SCNN1A</i>  | Pseudohypoaldosteronism 1                   |
| 12 | 6483610   | C | T | - | NA         | NM_001038.5:c.340G-A  | NP_001029.1:p.V114I | <i>SCNN1A</i>  | Cystic fibrosis, non-classic                |
| 12 | 6483767   | G | T | - | NA         | NM_001038.5:c.183C-A  | NP_001029.1:p.F61L  | <i>SCNN1A</i>  | Cystic fibrosis, non-classic                |
| 12 | 6483784   | G | A | - | NA         | NM_001038.5:c.166C-T  | NP_001029.1:p.R56X  | <i>SCNN1A</i>  | Pseudohypoaldosteronism 1                   |
| 16 | 23200921  | G | A | + | rs5736     | NM_001039.3:c.547G-A  | NP_001030.2:p.G183S | <i>SCNN1G</i>  | Bronchiectasis                              |
| 16 | 23200963  | G | A | + | rs5738     | NM_001039.3:c.589G-A  | NP_001030.2:p.E197K | <i>SCNN1G</i>  | Bronchiectasis                              |

|    |          |   |   |   |             |                       |                     |         |                                   |
|----|----------|---|---|---|-------------|-----------------------|---------------------|---------|-----------------------------------|
| 16 | 23224022 | C | T | + | NA          | NM_001039.3:c.1318C-T | NP_001030.2:p.R440X | SCNN1G  | Pseudohypoaldosteronism 1         |
| 16 | 23226429 | A | G | + | rs148985177 | NM_001039.3:c.1589A-G | NP_001030.2:p.N530S | SCNN1G  | Liddle syndrome                   |
| 16 | 23226539 | C | T | + | NA          | NM_001039.3:c.1699C-T | NP_001030.2:p.Q567X | SCNN1G  | Liddle syndrome                   |
| 16 | 23226558 | G | A | + | NA          | NM_001039.3:c.1718G-A | NP_001030.2:p.W573X | SCNN1G  | Pseudohypoaldosteronism 1         |
| 16 | 23226564 | G | A | + | NA          | NM_001039.3:c.1724G-A | NP_001030.2:p.W575X | SCNN1G  | Pseudohypoaldosteronism 1         |
| 16 | 23226573 | C | T | + | NA          | NM_001039.3:c.1733C-T | NP_001030.2:p.A578V | SCNN1G  | Hypertension                      |
| 16 | 23226647 | C | T | + | NA          | NM_001039.3:c.1807C-T | NP_001030.2:p.P603S | SCNN1G  | Hypertension                      |
| 16 | 23226667 | G | C | + | NA          | NM_001039.3:c.1827G-C | NP_001030.2:p.L609F | SCNN1G  | Hypertension                      |
| 16 | 23360029 | G | A | + | NA          | NM_000336.2:c.109G-A  | NP_000327.2:p.G37S  | SCNN1B  | Pseudohypoaldosteronism 1         |
| 16 | 23360165 | C | G | + | rs35731153  | NM_000336.2:c.245C-G  | NP_000327.2:p.S82C  | SCNN1B  | Cystic fibrosis, non-classic      |
| 16 | 23366671 | C | T | + | NA          | NM_000336.2:c.637C-T  | NP_000327.2:p.Q213X | SCNN1B  | Pseudohypoaldosteronism 1         |
| 16 | 23379200 | C | T | + | NA          | NM_000336.2:c.800C-T  | NP_000327.2:p.P267L | SCNN1B  | Cystic fibrosis, non-classic      |
| 16 | 23379263 | A | G | + | NA          | NM_000336.2:c.863A-G  | NP_000327.2:p.N288S | SCNN1B  | Bronchiectasis                    |
| 16 | 23379280 | G | A | + | rs72654338  | NM_000336.2:c.880G-A  | NP_000327.2:p.G294S | SCNN1B  | Cystic fibrosis, non-classic      |
| 16 | 23382781 | G | A | + | rs61759921  | NM_000336.2:c.1042G-A | NP_000327.2:p.V348M | SCNN1B  | Cystic fibrosis, non-classic      |
| 16 | 23383157 | C | A | + | NA          | NM_000336.2:c.1105C-A | NP_000327.2:p.P369T | SCNN1B  | Bronchiectasis ?                  |
| 16 | 23391814 | G | A | + | NA          | NM_000336.2:c.1615G-A | NP_000327.2:p.E539K | SCNN1B  | Cystic fibrosis, non-classic      |
| 16 | 23391887 | G | A | + | rs149868979 | NM_000336.2:c.1688G-A | NP_000327.2:p.R563Q | SCNN1B  | Hypertension                      |
| 16 | 23391895 | C | T | + | NA          | NM_000336.2:c.1696C-T | NP_000327.2:p.R566X | SCNN1B  | Liddle syndrome                   |
| 16 | 23391970 | C | T | + | NA          | NM_000336.2:c.1771C-T | NP_000327.2:p.Q591X | SCNN1B  | Liddle syndrome                   |
| 16 | 23391973 | C | T | + | NA          | NM_000336.2:c.1774C-T | NP_000327.2:p.P592S | SCNN1B  | Hypertension                      |
| 16 | 23392048 | C | T | + | NA          | NM_000336.2:c.1849C-T | NP_000327.2:p.P617S | SCNN1B  | Liddle syndrome                   |
| 16 | 23392049 | C | A | + | NA          | NM_000336.2:c.1850C-A | NP_000327.2:p.P617H | SCNN1B  | Liddle syndrome                   |
| 16 | 23392049 | C | T | + | NA          | NM_000336.2:c.1850C-T | NP_000327.2:p.P617L | SCNN1B  | Liddle syndrome                   |
| 16 | 23392051 | C | T | + | NA          | NM_000336.2:c.1852C-T | NP_000327.2:p.P618S | SCNN1B  | Liddle syndrome                   |
| 16 | 23392052 | C | A | + | NA          | NM_000336.2:c.1853C-A | NP_000327.2:p.P618H | SCNN1B  | Liddle syndrome                   |
| 16 | 23392052 | C | G | + | NA          | NM_000336.2:c.1853C-G | NP_000327.2:p.P618R | SCNN1B  | Liddle syndrome                   |
| 16 | 23392052 | C | T | + | NA          | NM_000336.2:c.1853C-T | NP_000327.2:p.P618L | SCNN1B  | Liddle syndrome                   |
| 16 | 23392057 | T | C | + | NA          | NM_000336.2:c.1858T-C | NP_000327.2:p.Y620H | SCNN1B  | Liddle syndrome                   |
| 16 | 23392093 | G | A | + | NA          | NM_000336.2:c.1894G-A | NP_000327.2:p.E632K | SCNN1B  | Hypertension                      |
| 16 | 67469696 | A | T | + | NA          | NM_000196.3:c.431A-T  | NP_000187.3:p.D144V | HSD11B2 | Hypertension, hypokalemic         |
| 16 | 67469917 | T | G | + | NA          | NM_000196.3:c.536T-G  | NP_000187.3:p.L179R | HSD11B2 | Apparent mineralocorticoid excess |
| 16 | 67469920 | C | T | + | NA          | NM_000196.3:c.539C-T  | NP_000187.3:p.S180F | HSD11B2 | Apparent mineralocorticoid excess |
| 16 | 67469935 | T | C | + | NA          | NM_000196.3:c.554T-C  | NP_000187.3:p.F185S | HSD11B2 | Hypertension, hypokalemic         |
| 16 | 67469937 | C | T | + | NA          | NM_000196.3:c.556C-T  | NP_000187.3:p.R186C | HSD11B2 | Apparent mineralocorticoid excess |
| 16 | 67470003 | C | T | + | NA          | NM_000196.3:c.622C-T  | NP_000187.3:p.R208C | HSD11B2 | Apparent mineralocorticoid excess |

|    |           |   |   |   |             |                       |                      |                |                                   |
|----|-----------|---|---|---|-------------|-----------------------|----------------------|----------------|-----------------------------------|
| 16 | 67470004  | G | A | + | rs28934592  | NM_000196.3:c.623G-A  | NP_000187.3:p.R208H  | <i>HSD11B2</i> | Apparent mineralocorticoid excess |
| 16 | 67470018  | C | T | + | NA          | NM_000196.3:c.637C-T  | NP_000187.3:p.R213C  | <i>HSD11B2</i> | Apparent mineralocorticoid excess |
| 16 | 67470043  | C | T | + | NA          | NM_000196.3:c.662C-T  | NP_000187.3:p.A221V  | <i>HSD11B2</i> | Apparent mineralocorticoid excess |
| 16 | 67470154  | G | A | + | NA          | NM_000196.3:c.667G-A  | NP_000187.3:p.D223N  | <i>HSD11B2</i> | Apparent mineralocorticoid excess |
| 16 | 67470167  | C | T | + | NA          | NM_000196.3:c.680C-T  | NP_000187.3:p.P227L  | <i>HSD11B2</i> | Hypertension                      |
| 16 | 67470182  | A | G | + | NA          | NM_000196.3:c.695A-G  | NP_000187.3:p.Y232C  | <i>HSD11B2</i> | Apparent mineralocorticoid excess |
| 16 | 67470197  | C | T | + | NA          | NM_000196.3:c.710C-T  | NP_000187.3:p.A237V  | <i>HSD11B2</i> | Apparent mineralocorticoid excess |
| 16 | 67470217  | G | A | + | NA          | NM_000196.3:c.730G-A  | NP_000187.3:p.D244N  | <i>HSD11B2</i> | Apparent mineralocorticoid excess |
| 16 | 67470236  | T | G | + | NA          | NM_000196.3:c.749T-G  | NP_000187.3:p.L250R  | <i>HSD11B2</i> | Apparent mineralocorticoid excess |
| 16 | 67470523  | C | T | + | rs28934594  | NM_000196.3:c.835C-T  | NP_000187.3:p.R279C  | <i>HSD11B2</i> | Apparent mineralocorticoid excess |
| 16 | 67470671  | C | T | + | NA          | NM_000196.3:c.983C-T  | NP_000187.3:p.A328V  | <i>HSD11B2</i> | Apparent mineralocorticoid excess |
| 16 | 67470697  | C | T | + | NA          | NM_000196.3:c.1009C-T | NP_000187.3:p.R337C  | <i>HSD11B2</i> | Apparent mineralocorticoid excess |
| 16 | 67470700  | T | C | + | NA          | NM_000196.3:c.1012T-C | NP_000187.3:p.Y338H  | <i>HSD11B2</i> | Apparent mineralocorticoid excess |
| 16 | 67470763  | C | T | + | NA          | NM_000196.3:c.1075C-T | NP_000187.3:p.R359W  | <i>HSD11B2</i> | Apparent mineralocorticoid excess |
| 16 | 67470808  | C | T | + | NA          | NM_000196.3:c.1120C-T | NP_000187.3:p.R374X  | <i>HSD11B2</i> | Hypertension                      |
| 16 | 67470815  | T | C | + | NA          | NM_000196.3:c.1127T-C | NP_000187.3:p.L376P  | <i>HSD11B2</i> | Apparent mineralocorticoid excess |
| 17 | 40939342  | G | A | + | rs55997156  | NM_032387.4:c.1523G-A | NP_115763.2:p.R508H  | <i>WNK4</i>    | Hypertension in pregnancy ?       |
| 17 | 40939417  | T | C | + | rs112963672 | NM_032387.4:c.1598T-C | NP_115763.2:p.L533P  | <i>WNK4</i>    | Hypertension in pregnancy ?       |
| 17 | 40939455  | A | G | + | NA          | NM_032387.4:c.1636A-G | NP_115763.2:p.M546V  | <i>WNK4</i>    | Hypertension ?                    |
| 17 | 40939485  | C | A | + | rs56003090  | NM_032387.4:c.1666C-A | NP_115763.2:p.P556T  | <i>WNK4</i>    | Hypertension ?                    |
| 17 | 40939498  | A | G | + | NA          | NM_032387.4:c.1679A-G | NP_115763.2:p.E560G  | <i>WNK4</i>    | Pseudohypoaldosteronism 2         |
| 17 | 40939501  | C | T | + | NA          | NM_032387.4:c.1682C-T | NP_115763.2:p.P561L  | <i>WNK4</i>    | Pseudohypoaldosteronism 2         |
| 17 | 40939503  | G | A | + | NA          | NM_032387.4:c.1684G-A | NP_115763.2:p.E562K  | <i>WNK4</i>    | Pseudohypoaldosteronism 2         |
| 17 | 40939509  | G | C | + | NA          | NM_032387.4:c.1690G-C | NP_115763.2:p.D564H  | <i>WNK4</i>    | Pseudohypoaldosteronism 2         |
| 17 | 40939510  | A | C | + | NA          | NM_032387.4:c.1691A-C | NP_115763.2:p.D564A  | <i>WNK4</i>    | Pseudohypoaldosteronism 2         |
| 17 | 40939512  | C | G | + | NA          | NM_032387.4:c.1693C-G | NP_115763.2:p.Q565E  | <i>WNK4</i>    | Pseudohypoaldosteronism 2         |
| 17 | 40948214  | A | G | + | NA          | NM_032387.4:c.3505A-G | NP_115763.2:p.K1169E | <i>WNK4</i>    | Pseudohypoaldosteronism 2         |
| 17 | 40948226  | C | A | + | NA          | NM_032387.4:c.3517C-A | NP_115763.2:p.P1173T | <i>WNK4</i>    | Hypertension ?                    |
| 17 | 40948262  | C | T | + | NA          | NM_032387.4:c.3553C-T | NP_115763.2:p.R1185C | <i>WNK4</i>    | Pseudohypoaldosteronism 2         |
| 4  | 149002514 | A | G | - | NA          | NM_000901.4:c.2936T-C | NP_000892.2:p.L979P  | <i>NR3C2</i>   | Pseudohypoaldosteronism 1         |
| 4  | 149002535 | T | C | - | NA          | NM_000901.4:c.2915A-G | NP_000892.2:p.E972G  | <i>NR3C2</i>   | Pseudohypoaldosteronism 1         |
| 4  | 149002551 | G | A | - | NA          | NM_000901.4:c.2899C-T | NP_000892.2:p.Q967X  | <i>NR3C2</i>   | Pseudohypoaldosteronism 1         |
| 4  | 149002611 | G | A | - | NA          | NM_000901.4:c.2839C-T | NP_000892.2:p.R947X  | <i>NR3C2</i>   | Pseudohypoaldosteronism 1         |
| 4  | 149002637 | A | C | - | NA          | NM_000901.4:c.2813T-G | NP_000892.2:p.L938R  | <i>NR3C2</i>   | Pseudohypoaldosteronism 1         |
| 4  | 149035283 | A | G | - | NA          | NM_000901.4:c.2771T-C | NP_000892.2:p.L924P  | <i>NR3C2</i>   | Pseudohypoaldosteronism 1         |
| 4  | 149041320 | A | G | - | NA          | NM_000901.4:c.2630T-C | NP_000892.2:p.L877P  | <i>NR3C2</i>   | Pseudohypoaldosteronism 1         |

|   |           |   |   |   |            |                          |                        |       |                                                    |
|---|-----------|---|---|---|------------|--------------------------|------------------------|-------|----------------------------------------------------|
| 4 | 149041369 | G | A | - | NA         | NM_000901.4:c.2581C-T    | NP_000892.2:p.R861X    | NR3C2 | Pseudohypoaldosteronism 1                          |
| 4 | 149041407 | A | G | - | NA         | NM_000901.4:c.2543T-C    | NP_000892.2:p.L848P    | NR3C2 | Pseudohypoaldosteronism 1                          |
| 4 | 149041423 | A | G | - | NA         | NM_000901.4:c.2527T-C    | NP_000892.2:p.S843P    | NR3C2 | Pseudohypoaldosteronism 1                          |
| 4 | 149073677 | G | A | - | NA         | NM_000901.4:c.2453C-T    | NP_000892.2:p.S818L    | NR3C2 | Pseudohypoaldosteronism 1                          |
| 4 | 149073685 | G | T | - | NA         | NM_000901.4:c.2445C-A    | NP_000892.2:p.S815R    | NR3C2 | Pseudohypoaldosteronism 1                          |
| 4 | 149073701 | G | A | - | rs41511344 | NM_000901.4:c.2429C-T    | NP_000892.2:p.S810L    | NR3C2 | Hypertension, early onset exacerbated in pregnancy |
| 4 | 149073717 | A | G | - | NA         | NM_000901.4:c.2413T-C    | NP_000892.2:p.S805P    | NR3C2 | Pseudohypoaldosteronism 1                          |
| 4 | 149075740 | T | C | - | NA         | NM_000901.4:c.2327A-G    | NP_000892.2:p.Q776R    | NR3C2 | Pseudohypoaldosteronism 1                          |
| 4 | 149075757 | G | T | - | NA         | NM_000901.4:c.2310C-A    | NP_000892.2:p.N770K    | NR3C2 | Pseudohypoaldosteronism 1                          |
| 4 | 149075792 | G | A | - | NA         | NM_000901.4:c.2275C-T    | NP_000892.2:p.P759S    | NR3C2 | Pseudohypoaldosteronism 1                          |
| 4 | 149076043 | G | C | - | NA         | NM_000901.4:c.2024C-G    | NP_000892.2:p.S675X    | NR3C2 | Pseudohypoaldosteronism 1                          |
| 4 | 149076047 | T | A | - | NA         | NM_000901.4:c.2020A-T    | NP_000892.2:p.K674X    | NR3C2 | Pseudohypoaldosteronism 1                          |
| 4 | 149076050 | G | A | - | NA         | NM_000901.4:c.2017C-T    | NP_000892.2:p.R673X    | NR3C2 | Pseudohypoaldosteronism 1                          |
| 4 | 149115934 | T | G | - | NA         | NM_000901.4:c.1977A-C    | NP_000892.2:p.R659S    | NR3C2 | Pseudohypoaldosteronism 1                          |
| 4 | 149115957 | G | A | - | NA         | NM_000901.4:c.1954C-T    | NP_000892.2:p.R652X    | NR3C2 | Pseudohypoaldosteronism 1                          |
| 4 | 149115976 | G | T | - | NA         | NM_000901.4:c.1935C-A    | NP_000892.2:p.C645X    | NR3C2 | Pseudohypoaldosteronism 1                          |
| 4 | 149115977 | C | G | - | NA         | NM_000901.4:c.1934G-C    | NP_000892.2:p.C645S    | NR3C2 | Pseudohypoaldosteronism 1                          |
| 4 | 149181130 | C | T | - | NA         | NM_000901.4:c.1897G-A    | NP_000892.2:p.G633R    | NR3C2 | Pseudohypoaldosteronism 1                          |
| 4 | 149181210 | C | G | - | NA         | NM_000901.4:c.1817G-C    | NP_000892.2:p.C606S    | NR3C2 | Pseudohypoaldosteronism 1                          |
| 4 | 149181259 | G | A | - | NA         | NM_000901.4:c.1768C-T    | NP_000892.2:p.R590X    | NR3C2 | Pseudohypoaldosteronism 1                          |
| 4 | 149356334 | C | T | - | NA         | NM_000901.4:c.1679G-A    | NP_000892.2:p.W560X    | NR3C2 | Pseudohypoaldosteronism 1                          |
| 4 | 149356404 | G | A | - | NA         | NM_000901.4:c.1609C-T    | NP_000892.2:p.R537X    | NR3C2 | Pseudohypoaldosteronism 1                          |
| 4 | 149356705 | A | T | - | NA         | NM_000901.4:c.1308T-A    | NP_000892.2:p.C436X    | NR3C2 | Pseudohypoaldosteronism 1                          |
| 4 | 149356984 | G | T | - | NA         | NM_000901.4:c.1029C-A    | NP_000892.2:p.Y343X    | NR3C2 | Pseudohypoaldosteronism 1                          |
| 4 | 149357525 | G | C | - | NA         | NM_000901.4:c.488C-G     | NP_000892.2:p.S163X    | NR3C2 | Pseudohypoaldosteronism 1                          |
| 4 | 149357611 | A | T | - | NA         | NM_000901.4:c.402T-A     | NP_000892.2:p.Y134X    | NR3C2 | Pseudohypoaldosteronism 1                          |
| 5 | 142661470 | A | G | - | NA         | NM_001018077.1:c.2318T-C | NP_001018087.1:p.L773P | NR3C1 | Glucocorticoid receptor deficiency                 |
| 5 | 142661547 | A | C | - | NA         | NM_001018077.1:c.2241T-G | NP_001018087.1:p.I747M | NR3C1 | Glucocorticoid receptor deficiency                 |
| 5 | 142661579 | A | G | - | NA         | NM_001018077.1:c.2209T-C | NP_001018087.1:p.F737L | NR3C1 | Glucocorticoid receptor deficiency                 |
| 5 | 142661603 | C | T | - | NA         | NM_001018077.1:c.2185G-A | NP_001018087.1:p.V729I | NR3C1 | Glucocorticoid receptor deficiency                 |
| 5 | 142662173 | C | T | - | NA         | NM_001018077.1:c.2141G-A | NP_001018087.1:p.R714Q | NR3C1 | Glucocorticoid receptor deficiency                 |

|   |           |   |   |   |             |                          |                        |         |                                        |
|---|-----------|---|---|---|-------------|--------------------------|------------------------|---------|----------------------------------------|
| 5 | 142662279 | C | T | - | NA          | NM_001018077.1:c.2035G-A | NP_001018087.1:p.G679S | NR3C1   | Glucocorticoid receptor deficiency     |
| 5 | 142675126 | T | A | - | NA          | NM_001018077.1:c.1922A-T | NP_001018087.1:p.D641V | NR3C1   | Glucocorticoid receptor deficiency     |
| 5 | 142680085 | A | G | - | NA          | NM_001018077.1:c.1712T-C | NP_001018087.1:p.V571A | NR3C1   | Glucocorticoid receptor deficiency     |
| 5 | 142680121 | A | T | - | NA          | NM_001018077.1:c.1676T-A | NP_001018087.1:p.I559N | NR3C1   | Glucocorticoid receptor deficiency     |
| 5 | 142680130 | G | A | - | NA          | NM_001018077.1:c.1667C-T | NP_001018087.1:p.T556I | NR3C1   | Glucocorticoid resistance              |
| 5 | 142689700 | C | T | - | NA          | NM_001018077.1:c.1430G-A | NP_001018087.1:p.R477H | NR3C1   | Glucocorticoid receptor deficiency     |
| 5 | 142689725 | G | A | - | NA          | NM_001018077.1:c.1405C-T | NP_001018087.1:p.R469X | NR3C1   | Glucocorticoid receptor deficiency     |
| 5 | 142693717 | C | G | - | NA          | NM_001018077.1:c.1201G-C | NP_001018087.1:p.D401H | NR3C1   | Increased glucocorticoid sensitivity   |
| 8 | 143955835 | A | G | - | NA          | NM_000497.3:c.1466T-C    | NP_000488.3:p.L489S    | CYP11B1 | Adrenal hyperplasia                    |
| 8 | 143956389 | A | G | - | NA          | NM_000497.3:c.1382T-C    | NP_000488.3:p.L461P    | CYP11B1 | Adrenal hyperplasia                    |
| 8 | 143956411 | G | A | - | NA          | NM_000497.3:c.1360C-T    | NP_000488.3:p.R454C    | CYP11B1 | Steroid-11 beta-hydroxylase deficiency |
| 8 | 143956413 | C | T | - | NA          | NM_000497.3:c.1358G-A    | NP_000488.3:p.R453Q    | CYP11B1 | Adrenal hyperplasia                    |
| 8 | 143956428 | C | T | - | rs28934586  | NM_000497.3:c.1343G-A    | NP_000488.3:p.R448H    | CYP11B1 | Steroid-11 beta-hydroxylase deficiency |
| 8 | 143956429 | G | A | - | NA          | NM_000497.3:c.1342C-T    | NP_000488.3:p.R448C    | CYP11B1 | Adrenal hyperplasia                    |
| 8 | 143956434 | C | A | - | NA          | NM_000497.3:c.1337G-T    | NP_000488.3:p.G446V    | CYP11B1 | Steroid-11 beta-hydroxylase deficiency |
| 8 | 143956440 | C | T | - | NA          | NM_000497.3:c.1331G-A    | NP_000488.3:p.G444D    | CYP11B1 | Steroid-11 beta-hydroxylase deficiency |
| 8 | 143956449 | A | C | - | NA          | NM_000497.3:c.1322T-G    | NP_000488.3:p.V441G    | CYP11B1 | Steroid-11 beta-hydroxylase deficiency |
| 8 | 143956491 | C | T | - | NA          | NM_000497.3:c.1280G-A    | NP_000488.3:p.R427H    | CYP11B1 | Adrenal hyperplasia                    |
| 8 | 143956502 | A | C | - | NA          | NM_000497.3:c.1269T-G    | NP_000488.3:p.Y423X    | CYP11B1 | Steroid-11 beta-hydroxylase deficiency |
| 8 | 143956693 | G | A | - | rs4541      | NM_000497.3:c.1157C-T    | NP_000488.3:p.A386V    | CYP11B1 | Adrenal hyperplasia                    |
| 8 | 143956699 | C | T | - | NA          | NM_000497.3:c.1151G-A    | NP_000488.3:p.R384Q    | CYP11B1 | Steroid-11 beta-hydroxylase deficiency |
| 8 | 143956700 | G | C | - | NA          | NM_000497.3:c.1150C-G    | NP_000488.3:p.R384G    | CYP11B1 | Steroid-11 beta-hydroxylase deficiency |
| 8 | 143956714 | C | A | - | NA          | NM_000497.3:c.1136G-T    | NP_000488.3:p.G379V    | CYP11B1 | Steroid-11 beta-hydroxylase deficiency |
| 8 | 143957128 | C | T | - | NA          | NM_000497.3:c.1121G-A    | NP_000488.3:p.R374Q    | CYP11B1 | Steroid-11 beta-hydroxylase deficiency |
| 8 | 143957137 | T | C | - | NA          | NM_000497.3:c.1112A-G    | NP_000488.3:p.E371G    | CYP11B1 | Adrenal hyperplasia                    |
| 8 | 143957146 | G | T | - | NA          | NM_000497.3:c.1103C-A    | NP_000488.3:p.A368D    | CYP11B1 | Steroid-11 beta-hydroxylase deficiency |
| 8 | 143957183 | G | A | - | rs146124466 | NM_000497.3:c.1066C-T    | NP_000488.3:p.Q356X    | CYP11B1 | Steroid-11 beta-hydroxylase deficiency |
| 8 | 143957228 | G | T | - | NA          | NM_000497.3:c.1021C-A    | NP_000488.3:p.R341S    | CYP11B1 | Adrenal hyperplasia                    |
| 8 | 143957237 | G | A | - | NA          | NM_000497.3:c.1012C-T    | NP_000488.3:p.Q338X    | CYP11B1 | Steroid-11 beta-hydroxylase deficiency |

|   |           |   |   |   |             |                      |                     |                |                                                        |
|---|-----------|---|---|---|-------------|----------------------|---------------------|----------------|--------------------------------------------------------|
| 8 | 143957257 | G | A | - | NA          | NM_000497.3:c.992C-T | NP_000488.3:p.A331V | <i>CYP11B1</i> | Adrenal hyperplasia                                    |
| 8 | 143957288 | A | C | - | NA          | NM_000497.3:c.961T-G | NP_000488.3:p.F321V | <i>CYP11B1</i> | Adrenal hyperplasia                                    |
| 8 | 143957293 | G | A | - | NA          | NM_000497.3:c.956C-T | NP_000488.3:p.T319M | <i>CYP11B1</i> | Steroid-11 beta-hydroxylase deficiency                 |
| 8 | 143957658 | G | A | - | NA          | NM_000497.3:c.953C-T | NP_000488.3:p.T318M | <i>CYP11B1</i> | Steroid-11 beta-hydroxylase deficiency                 |
| 8 | 143957658 | G | C | - | NA          | NM_000497.3:c.953C-G | NP_000488.3:p.T318R | <i>CYP11B1</i> | Steroid-11 beta-hydroxylase deficiency                 |
| 8 | 143957659 | T | G | - | NA          | NM_000497.3:c.952A-C | NP_000488.3:p.T318P | <i>CYP11B1</i> | Steroid-11 beta-hydroxylase deficiency                 |
| 8 | 143957671 | C | G | - | NA          | NM_000497.3:c.940G-C | NP_000488.3:p.G314R | <i>CYP11B1</i> | Steroid-11 beta-hydroxylase deficiency                 |
| 8 | 143957694 | G | A | - | NA          | NM_000497.3:c.917C-T | NP_000488.3:p.A306V | <i>CYP11B1</i> | Steroid-11 beta-hydroxylase deficiency                 |
| 8 | 143957715 | A | G | - | NA          | NM_000497.3:c.896T-C | NP_000488.3:p.L299P | <i>CYP11B1</i> | Steroid-11 beta-hydroxylase deficiency                 |
| 8 | 143957811 | C | T | - | NA          | NM_000497.3:c.800G-A | NP_000488.3:p.G267D | <i>CYP11B1</i> | Adrenal hyperplasia                                    |
| 8 | 143958098 | C | G | - | NA          | NM_000497.3:c.799G-C | NP_000488.3:p.G267R | <i>CYP11B1</i> | Adrenal hyperplasia                                    |
| 8 | 143958104 | G | A | - | NA          | NM_000497.3:c.793C-T | NP_000488.3:p.Q265X | <i>CYP11B1</i> | Adrenal hyperplasia                                    |
| 8 | 143958121 | G | T | - | NA          | NM_000497.3:c.776C-A | NP_000488.3:p.A259D | <i>CYP11B1</i> | Steroid-11 beta-hydroxylase deficiency                 |
| 8 | 143958157 | C | T | - | NA          | NM_000497.3:c.740G-A | NP_000488.3:p.W247X | <i>CYP11B1</i> | Adrenal hyperplasia                                    |
| 8 | 143958514 | T | A | - | NA          | NM_000497.3:c.520A-T | NP_000488.3:p.K174X | <i>CYP11B1</i> | Steroid-11 beta-hydroxylase deficiency                 |
| 8 | 143958540 | G | T | - | NA          | NM_000497.3:c.494C-A | NP_000488.3:p.A165D | <i>CYP11B1</i> | Steroid-11 beta-hydroxylase deficiency                 |
| 8 | 143958558 | G | A | - | NA          | NM_000497.3:c.476C-T | NP_000488.3:p.P159L | <i>CYP11B1</i> | Steroid-11 beta-hydroxylase deficiency,<br>non-classic |
| 8 | 143958613 | G | A | - | NA          | NM_000497.3:c.421C-T | NP_000488.3:p.R141X | <i>CYP11B1</i> | Steroid-11 beta-hydroxylase deficiency                 |
| 8 | 143958637 | T | G | - | rs104894067 | NM_000497.3:c.397A-C | NP_000488.3:p.N133H | <i>CYP11B1</i> | Steroid-11 beta-hydroxylase deficiency                 |
| 8 | 143960458 | C | T | - | NA          | NM_000497.3:c.385G-A | NP_000488.3:p.V129M | <i>CYP11B1</i> | Adrenal hyperplasia                                    |
| 8 | 143960495 | C | G | - | NA          | NM_000497.3:c.348G-C | NP_000488.3:p.W116C | <i>CYP11B1</i> | Steroid-11 beta-hydroxylase deficiency                 |
| 8 | 143960496 | C | T | - | NA          | NM_000497.3:c.347G-A | NP_000488.3:p.W116X | <i>CYP11B1</i> | Steroid-11 beta-hydroxylase deficiency                 |
| 8 | 143960497 | A | C | - | NA          | NM_000497.3:c.346T-G | NP_000488.3:p.W116G | <i>CYP11B1</i> | Steroid-11 beta-hydroxylase deficiency                 |
| 8 | 143960562 | G | A | - | NA          | NM_000497.3:c.281C-T | NP_000488.3:p.P94L  | <i>CYP11B1</i> | Steroid-11 beta-hydroxylase deficiency                 |
| 8 | 143960579 | C | T | - | NA          | NM_000497.3:c.264G-A | NP_000488.3:p.M88I  | <i>CYP11B1</i> | Steroid-11 beta-hydroxylase deficiency,<br>non-classic |
| 8 | 143961102 | C | T | - | rs4534      | NM_000497.3:c.128G-A | NP_000488.3:p.R43Q  | <i>CYP11B1</i> | Adrenal hyperplasia                                    |
| 8 | 143961106 | G | A | - | NA          | NM_000497.3:c.124C-T | NP_000488.3:p.P42S  | <i>CYP11B1</i> | Steroid-11 beta-hydroxylase deficiency                 |
| 8 | 143961175 | G | A | - | NA          | NM_000497.3:c.55C-T  | NP_000488.3:p.Q19X  | <i>CYP11B1</i> | Steroid-11 beta-hydroxylase deficiency                 |



Online Table III.

| <i>Studies</i> | <i>N</i> | <i>% Female</i> | <i>Age in years</i><br><i>Mean ± SD (Range)</i> | <i>% Hypertensive</i> | <i>% HTN medicated</i> |
|----------------|----------|-----------------|-------------------------------------------------|-----------------------|------------------------|
| ARIC EA        | 9,747    | 53.0            | 54.3 ± 5.7 (44 – 66)                            | 27.3                  | 19.7                   |
| ARIC AA        | 3,207    | 62.6            | 53.3 ± 5.8 (44 – 66)                            | 55.4                  | 40.4                   |
| CLUE EA        | 6,591    | 63.7            | 55.0 ± 13.5 (28 – 95)                           | 48.0                  | 24.2                   |
| FBPP EA        | 3,659    | 53.2            | 50.4 ± 15.6 (11 – 95)                           | 43.2                  | 28.0                   |
| FBPP AA        | 2,862    | 62.3            | 44.4 ± 13.9 (12 – 88)                           | 49.5                  | 28.9                   |

| <i>Studies</i> | <i>SBP (mmHg)</i><br><i>Mean ± SD (Range)</i> | <i>DBP (mmHg)</i><br><i>Mean ± SD (Range)</i> | <i>σ<sub>residuals</sub> (mmHg)</i> |            |
|----------------|-----------------------------------------------|-----------------------------------------------|-------------------------------------|------------|
|                |                                               |                                               | <i>SBP</i>                          | <i>DBP</i> |
| ARIC EA        | 121.4 ± 19.5 (61 – 221)                       | 73.6 ± 11.5 (12 – 139)                        | 17.9                                | 11.0       |
| ARIC AA        | 134.6 ± 23.2 (73 – 257)                       | 83.9 ± 13.7 (34 – 152)                        | 17.7                                | 9.4        |
| CLUE EA        | 128.7 ± 17.1 (80 – 220)                       | 79.5 ± 9.3 (50 – 134)                         | 17.2                                | 10.0       |
| FBPP EA        | 121.2 ± 29.4 (68 – 240)                       | 68.9 ± 10.6 (37 – 114)                        | 18.9                                | 10.0       |
| FBPP AA        | 127.8 ± 21.5 (72 – 221)                       | 74.8 ± 12.7 (39 – 139)                        | 21.3                                | 12.2       |

Online Table IV.

| <i>Gene</i>    | <b>EA</b>            |            |          | <b>AA</b>  |                      |          |
|----------------|----------------------|------------|----------|------------|----------------------|----------|
|                | <i>SBP</i>           | <i>DBP</i> | <i>k</i> | <i>SBP</i> | <i>DBP</i>           | <i>k</i> |
| All            | 0.007                | 0.004      | 1,106    | 0.066      | 0.064                | 1,667    |
| <i>AGT</i>     | 0.004                | 0.121      | 59       | 0.666      | 0.675                | 113      |
| <i>CYP11B1</i> | 0.022                | 0.180      | 52       | 0.115      | 0.370                | 86       |
| <i>CYP17A1</i> | 0.026                | 0.098      | 19       | 0.017      | 0.310                | 30       |
| <i>HSD11B2</i> | 0.010                | 0.016      | 52       | 0.147      | 0.883                | 63       |
| <i>NR3C1</i>   | 0.377                | 0.703      | 91       | 0.030      | 0.040                | 163      |
| <i>NR3C2</i>   | $4.0 \times 10^{-4}$ | 0.058      | 325      | 0.024      | 0.555                | 494      |
| <i>SCNN1A</i>  | 0.044                | 0.242      | 64       | 0.305      | 0.583                | 136      |
| <i>SCNN1B</i>  | 0.129                | 0.172      | 63       | 0.057      | 0.539                | 109      |
| <i>SCNN1G</i>  | $1.9 \times 10^{-4}$ | 0.123      | 131      | 0.195      | 0.447                | 120      |
| <i>WNK1</i>    | 0.381                | 0.172      | 216      | 0.005      | $9.8 \times 10^{-4}$ | 281      |
| <i>WNK4</i>    | 0.376                | 0.307      | 34       | 0.009      | 0.336                | 72       |

Online Table V.

| <i>Chr</i> | <i>BP</i> | <i>rsID</i>     | <i>A1</i> | <i>A2</i> | <i>MAF (%)</i> | <i>Effect (mmHg)</i> | <i>SE</i> | <i>P-value</i>        |
|------------|-----------|-----------------|-----------|-----------|----------------|----------------------|-----------|-----------------------|
| 10         | 104598995 | chr10:104598995 | A         | G         | 9.58           | -1.715               | 0.4167    | 3.87x10 <sup>-5</sup> |
| 10         | 104594507 | rs1004467       | G         | A         | 9.54           | -1.759               | 0.4183    | 2.64x10 <sup>-5</sup> |
| 10         | 104604916 | rs11191416      | G         | T         | 9.59           | -1.713               | 0.4163    | 3.90x10 <sup>-5</sup> |
| 10         | 104591393 | rs17115100      | T         | G         | 9.54           | -1.759               | 0.4183    | 2.64x10 <sup>-5</sup> |
| 10         | 104595849 | rs3824755       | C         | G         | 9.58           | -1.738               | 0.4167    | 3.05x10 <sup>-5</sup> |
| 10         | 104604563 | rs7912206       | T         | C         | 9.58           | -1.715               | 0.4167    | 3.87x10 <sup>-5</sup> |

Online Table VI.

| Locus                         | rsID       | Chr | hg19pos   | Strand | Common Allele | Rare Allele | CLUE    |             |             | FBPP_EA |             |             | FBPP_AA |             |             |
|-------------------------------|------------|-----|-----------|--------|---------------|-------------|---------|-------------|-------------|---------|-------------|-------------|---------|-------------|-------------|
|                               |            |     |           |        |               |             | MAF (%) | SBP P-value | DBP P-value | MAF (%) | SBP P-value | DBP P-value | MAF (%) | SBP P-value | DBP P-value |
| <i>MOV10</i>                  | rs2932538  | 1   | 113127062 | -      | C             | T           | 24.9    | 0.151       | 0.242       | 24.3    | 0.839       | 0.970       | 18.1    | 0.655       | 0.358       |
| <i>HAAO</i>                   | rs7585445  | 2   | 43083070  | +      | T             | C           | 26.6    | 0.735       | 0.411       | 27.3    | 0.960       | 0.966       | 47.0    | 0.258       | 0.790       |
| <i>SLC4A7</i>                 | rs13082711 | 3   | 27537909  | +      | T             | C           | 21.9    | 0.433       | 0.284       | 22.9    | 0.204       | 0.123       | 6.0     | 0.559       | 0.204       |
| <i>ULK4</i>                   | rs3774372  | 3   | 41877414  | +      | T             | C           | 17.0    | 0.814       | 0.055       | 16.3    | 0.951       | 0.116       | 19.8    | 0.272       | 0.575       |
| <i>MDS1</i>                   | rs419076   | 3   | 169100894 | +      | C             | T           | 49.5    | 0.928       | 0.474       | 48.0    | 0.255       | 0.901       | 50.1    | 0.564       | 0.340       |
| <i>SLC39A8</i>                | rs13107325 | 4   | 103326864 | +      | C             | T           | 7.1     | 0.119       | 0.051       | 6.7     | 0.946       | 0.824       | 1.1     | 0.818       | 0.977       |
| <i>GUCY1A3</i>                | rs13139571 | 4   | 156783668 | +      | C             | A           | 24.8    | 0.153       | 0.402       | 22.5    | 0.756       | 0.839       | 14.5    | 0.098       | 0.282       |
| <i>C5orf23</i><br><i>NPR3</i> | rs1173771  | 5   | 32815028  | -      | C             | T           | 39.0    | 0.186       | 0.155       | 39.4    | 0.715       | 0.636       | 23.1    | 0.056       | 0.207       |
| <i>EBF1</i>                   | rs11953630 | 5   | 157845402 | +      | C             | T           | 38.3    | 0.682       | 0.922       | 36.4    | 0.294       | 0.325       | 20.2    | 0.393       | 0.847       |
| <i>HFE</i> -<br>missense      | rs1799945  | 6   | 26091179  | +      | C             | G           | 15.0    | 0.191       | 0.089       | 15.9    | 0.061       | 0.290       | 2.9     | 0.363       | 0.834       |
| <i>HFE</i>                    | rs1800562  | 6   | 26093141  | +      | G             | A           | 6.3     | 0.890       | 0.860       | 6.4     | 0.332       | 0.217       | 0.9     | 0.978       | 0.512       |
| <i>BAT3</i>                   | rs805303   | 6   | 31616366  | -      | C             | T           | 35.8    | 0.762       | 0.392       | 36.8    | 0.154       | 0.733       | 59.5    | 0.731       | 0.661       |
| <i>GRIFIN</i>                 | rs2969070  | 7   | 2319260   | +      | A             | G           | 36.6    | 0.567       | 0.900       | 38.0    | 0.845       | 0.817       | 7.6     | 0.129       | 0.246       |
| <i>NRCAM</i>                  | rs2193241  | 7   | 107753620 | +      | T             | C           | 41.8    | 0.206       | 0.859       | 41.0    | 0.819       | 0.426       | 70.5    | 0.151       | 0.103       |
| <i>C8ORF38</i>                | rs16917233 | 8   | 96044967  | +      | A             | C           | 14.3    | 0.695       | 0.241       | 14.4    | 0.636       | 0.633       | 14.8    | 0.604       | 0.562       |
| <i>CACNB2</i>                 | rs4373814  | 10  | 18419972  | +      | G             | C           | 43.8    | 0.541       | 0.041       | 42.6    | 0.245       | 0.329       | 56.7    | 0.119       | 0.202       |
| <i>PLCE1</i>                  | rs932764   | 10  | 95895940  | +      | A             | G           | 44.6    | 0.522       | 0.132       | 43.3    | 0.300       | 0.523       | 21.5    | 0.972       | 0.399       |
| <i>ADM</i>                    | rs7129220  | 11  | 10350538  | +      | G             | A           | 11.5    | 0.841       | 0.848       | 10.8    | 0.552       | 0.644       | 6.8     | 0.042       | 0.697       |
| <i>TMEM133</i>                | rs604723   | 11  | 100610546 | +      | C             | T           | 26.3    | 0.477       | 0.481       | 28.8    | 0.365       | 0.420       | 4.3     | 0.857       | 0.440       |
| <i>ATP2B1</i>                 | rs1681472  | 12  | 90008709  | -      | T             | C           | 17.1    | 5.18E-04    | 1.96E-04    | 16.0    | 0.023       | 0.006       | 10.1    | 0.182       | 0.175       |
| <i>TBX3</i>                   | rs11067335 | 12  | 115390155 | +      | C             | T           | 30.1    | 0.411       | 0.418       | 31.5    | 0.733       | 0.496       | 34.5    | 0.405       | 0.784       |
| <i>FES</i>                    | rs2521501  | 15  | 91437388  | -      | T             | A           | 32.2    | 1.69E-05    | 8.05E-04    | 32.4    | 0.478       | 0.357       | 22.5    | 0.360       | 0.172       |
| <i>SLC12A3</i>                | rs11648751 | 16  | 56937012  | +      | C             | T           | 11.8    | 0.376       | 0.397       | 11.1    | 0.272       | 0.567       | 17.4    | 0.442       | 0.672       |
| <i>GOSR2</i>                  | rs17608766 | 17  | 45013271  | +      | T             | C           | 13.9    | 0.016       | 0.064       | 13.4    | 0.922       | 0.425       | 2.1     | 0.582       | 0.185       |
| <i>ZNF652</i>                 | rs12940887 | 17  | 47402807  | +      | C             | T           | 37.0    | 0.938       | 0.814       | 38.1    | 0.459       | 0.066       | 8.1     | 0.981       | 0.355       |
| <i>JAG1</i>                   | rs1327235  | 20  | 10969030  | +      | A             | G           | 45.6    | 0.230       | 0.125       | 47.5    | 0.472       | 0.013       | 53.2    | 0.855       | 0.469       |

|                                                 |           |    |          |   |   |   |      |       |       |      |       |       |      |       |       |
|-------------------------------------------------|-----------|----|----------|---|---|---|------|-------|-------|------|-------|-------|------|-------|-------|
| <i>C20orf174</i><br><i>ACAT1</i><br><i>EDN3</i> | rs6015450 | 20 | 57751117 | + | A | G | 12.7 | 0.278 | 0.237 | 13.4 | 0.022 | 0.253 | 20.7 | 0.245 | 0.513 |
|-------------------------------------------------|-----------|----|----------|---|---|---|------|-------|-------|------|-------|-------|------|-------|-------|

Online Table VII.

| BP trait | Rare variant | Chr | Alleles | CLUE    |        |                             | FBPP (EA) |        |         | FBPP (AA)   |              |              |
|----------|--------------|-----|---------|---------|--------|-----------------------------|-----------|--------|---------|-------------|--------------|--------------|
|          |              |     |         | MAF (%) | Effect | P-value                     | MAF (%)   | Effect | P-value | MAF (%)     | Effect       | P-value      |
| SBP      | rs17755373   | 12  | T       | 1.00    | 0.019  | 0.825                       | 1.40      | 0.099  | 0.314   | 0.30        | 0.231        | 0.364        |
| DBP      | rs17755373   | 12  | T       | 1.00    | 0.155  | 0.072                       | 1.40      | 0.041  | 0.675   | 0.30        | 0.302        | 0.234        |
| PP       | rs17755373   | 12  | T       | 1.00    | 0.099  | 0.251                       | 1.40      | 0.101  | 0.304   | 0.30        | 0.082        | 0.748        |
| MAP      | rs17755373   | 12  | T       | 1.00    | 0.099  | 0.248                       | 1.40      | 0.074  | 0.451   | 0.30        | 0.298        | 0.239        |
| SBP      | rs2286007    | 12  | T       | 7.80    | 0.008  | 0.814                       | 7.20      | 0.042  | 0.354   | 0.90        | -0.03        | 0.83         |
| DBP      | rs2286007    | 12  | T       | 7.80    | 0.009  | 0.79                        | 7.20      | 0.031  | 0.488   | 0.90        | 0.052        | 0.712        |
| PP       | rs2286007    | 12  | T       | 7.80    | 0.004  | 0.911                       | 7.20      | 0.033  | 0.464   | 0.90        | 0.001        | 0.996        |
| MAP      | rs2286007    | 12  | T       | 7.80    | 0.009  | 0.785                       | 7.20      | 0.025  | 0.583   | 0.90        | 0.007        | 0.963        |
| SBP      | rs2681472*   | 12  | C       | 17.10   | 0.081  | <b>5.18x10<sup>-4</sup></b> | 16.00     | 0.073  | 0.023   | 10.10       | 0.059        | 0.182        |
| DBP      | rs2681472*   | 12  | C       | 17.10   | 0.087  | <b>1.96x10<sup>-4</sup></b> | 16.00     | 0.087  | 0.006   | 10.10       | 0.059        | 0.175        |
| PP       | rs2681472*   | 12  | C       | 17.10   | 0.042  | 0.07                        | 16.00     | 0.034  | 0.281   | 10.10       | 0.035        | 0.433        |
| MAP      | rs2681472*   | 12  | C       | 17.10   | 0.091  | <b>9.44x10<sup>-5</sup></b> | 16.00     | 0.081  | 0.012   | 10.10       | 0.055        | 0.214        |
| SBP      | rs56030257   | 17  | C       | 0.10    | 0.074  | 0.825                       | 0.10      | 0.212  | 0.636   | 0.00        | -            | -            |
| DBP      | rs56030257   | 17  | C       | 0.10    | 0.076  | 0.819                       | 0.10      | 0.014  | 0.975   | 0.00        | -            | -            |
| PP       | rs56030257   | 17  | C       | 0.10    | 0.164  | 0.623                       | 0.10      | 0.269  | 0.548   | 0.00        | -            | -            |
| MAP      | rs56030257   | 17  | C       | 0.10    | 0.008  | 0.982                       | 0.10      | 0.062  | 0.889   | 0.00        | -            | -            |
| SBP      | rs5742912    | 12  | G       | 2.40    | 0.022  | 0.695                       | 1.70      | 0.156  | 0.094   | 0.30        | 0.103        | 0.66         |
| DBP      | rs5742912    | 12  | G       | 2.40    | 0.093  | 0.101                       | 1.70      | 0.087  | 0.35    | 0.30        | 0.106        | 0.651        |
| PP       | rs5742912    | 12  | G       | 2.40    | 0.045  | 0.433                       | 1.70      | 0.145  | 0.122   | 0.30        | 0.23         | 0.328        |
| MAP      | rs5742912    | 12  | G       | 2.40    | 0.065  | 0.249                       | 1.70      | 0.112  | 0.235   | 0.30        | 0.11         | 0.637        |
| SBP      | rs72646501   | 16  | A       | 0.20    | 0.292  | 0.182                       | 0.10      | 0.098  | 0.758   | 1.80        | 0.135        | 0.198        |
| DBP      | rs72646501   | 16  | A       | 0.20    | 0.3    | 0.169                       | 0.10      | 0.179  | 0.573   | 1.80        | 0.165        | 0.115        |
| PP       | rs72646501   | 16  | A       | 0.20    | 0.162  | 0.458                       | 0.10      | 0.003  | 0.992   | <b>1.80</b> | <b>0.323</b> | <b>0.002</b> |
| MAP      | rs72646501   | 16  | A       | 0.20    | 0.321  | 0.142                       | 0.10      | 0.2    | 0.528   | 1.80        | 0.073        | 0.487        |
| SBP      | rs72650764   | 12  | G       | 0.03    | 0.625  | 0.377                       | 0.01      | 0.755  | 0.451   | 0.03        | 0.121        | 0.866        |
| DBP      | rs72650764   | 12  | G       | 0.03    | 1.109  | 0.117                       | 0.01      | 0.881  | 0.379   | 0.03        | 1.088        | 0.128        |
| PP       | rs72650764   | 12  | G       | 0.03    | 0.029  | 0.967                       | 0.01      | 0.375  | 0.708   | 0.03        | 0.706        | 0.328        |
| MAP      | rs72650764   | 12  | G       | 0.03    | 0.958  | 0.175                       | 0.01      | 0.856  | 0.392   | 0.03        | 0.749        | 0.294        |
| SBP      | rs72647528   | 16  | A       | 0.10    | 0.157  | 0.53                        | 0.01      | 0.395  | 0.43    | 0.00        | -            | -            |
| DBP      | rs72647528   | 16  | A       | 0.10    | 0.05   | 0.842                       | 0.01      | 0.476  | 0.342   | 0.00        | -            | -            |
| PP       | rs72647528   | 16  | A       | 0.10    | 0.259  | 0.301                       | 0.01      | 0.186  | 0.71    | 0.00        | -            | -            |

|     |            |    |   |      |       |       |      |       |       |      |       |       |
|-----|------------|----|---|------|-------|-------|------|-------|-------|------|-------|-------|
|     | rs72647528 |    |   |      |       |       |      |       |       |      |       |       |
| MAP |            | 16 | A | 0.10 | -0.05 | 0.843 | 0.01 | 0.407 | 0.415 | 0.00 | -     | -     |
| SBP | rs72647542 | 16 | T | 0.00 | -     | -     | 0.10 | 0.656 | 0.143 | 0.00 | -     | -     |
| DBP | rs72647542 | 16 | T | 0.00 | -     | -     | 0.10 | 0.607 | 0.175 | 0.00 | -     | -     |
| PP  | rs72647542 | 16 | T | 0.00 | -     | -     | 0.10 | 0.437 | 0.329 | 0.00 | -     | -     |
| MAP | rs72647542 | 16 | T | 0.00 | -     | -     | 0.10 | 0.877 | 0.05  | 0.00 | -     | -     |
|     | rs72645625 |    |   |      |       |       |      |       |       |      |       |       |
| SBP |            | 4  | C | 0.00 | -     | -     | 0.04 | 0.954 | 0.099 | 0.03 | 0.273 | 0.704 |
| DBP | rs72645625 | 4  | C | 0.00 | -     | -     | 0.04 | 0.593 | 0.305 | 0.03 | 0.116 | 0.871 |
|     | rs72645625 |    |   |      |       |       |      |       |       |      |       |       |
| PP  |            | 4  | C | 0.00 | -     | -     | 0.04 | 0.838 | 0.147 | 0.03 | 0.478 | 0.508 |
|     | rs72645625 |    |   |      |       |       |      |       |       |      |       |       |
| MAP |            | 4  | C | 0.00 | -     | -     | 0.04 | 0.725 | 0.21  | 0.03 | 0.017 | 0.981 |
|     | rs72657550 |    |   |      |       |       |      |       |       |      |       |       |
| SBP |            | 12 | G | 0.00 | -     | -     | 0.04 | 0.363 | 0.717 | 0.00 | -     | -     |
| DBP | rs72657550 | 12 | G | 0.00 | -     | -     | 0.04 | 0.178 | 0.859 | 0.00 | -     | -     |
|     | rs72657550 |    |   |      |       |       |      |       |       |      |       |       |
| PP  |            | 12 | G | 0.00 | -     | -     | 0.04 | 0.602 | 0.548 | 0.00 | -     | -     |
|     | rs72657550 |    |   |      |       |       |      |       |       |      |       |       |
| MAP |            | 12 | G | 0.00 | -     | -     | 0.04 | 0.852 | 0.394 | 0.00 | -     | -     |
|     | rs72654338 |    |   |      |       |       |      |       |       |      |       |       |
| SBP |            | 16 | A | 0.00 | -     | -     | 0.06 | 0.702 | 0.321 | 0.05 | 0.046 | 0.937 |
| DBP | rs72654338 | 16 | A | 0.00 | -     | -     | 0.06 | 1.043 | 0.141 | 0.05 | 1.112 | 0.057 |
|     | rs72654338 |    |   |      |       |       |      |       |       |      |       |       |
| PP  |            | 16 | A | 0.00 | -     | -     | 0.06 | 0.193 | 0.785 | 0.05 | 0.961 | 0.103 |
| MAP | rs72654338 | 16 | A | 0.00 | -     | -     | 0.06 | 0.811 | 0.252 | 0.05 | 0.806 | 0.167 |

Online Table VIII.

|         |                | <i>Effect Size (<math>\sigma</math>)</i> |      |      |      |      |      |
|---------|----------------|------------------------------------------|------|------|------|------|------|
| (A)     | <i>N=3,000</i> | 0.01                                     | 0.05 | 0.25 | 0.50 | 1.00 | 2.00 |
| MAF (%) | 0.05           | *                                        | *    | *    | *    | 14   | 74   |
|         | 0.10           | *                                        | *    | *    | *    | 36   | 98   |
|         | 1              | *                                        | *    | 19   | 85   | 100  | 100  |
|         | 5              | *                                        | *    | 92   | 100  | 100  | 100  |
|         | 10             | *                                        | *    | 100  | 100  | 100  | 100  |
|         | 20             | *                                        | 10   | 100  | 100  | 100  | 100  |
| (B)     | <i>N=7,000</i> |                                          |      |      |      |      |      |
| MAF (%) | 0.05           | *                                        | *    | *    | *    | 44   | 99   |
|         | 0.10           | *                                        | *    | *    | 17   | 82   | 100  |
|         | 1              | *                                        | *    | 55   | 100  | 100  | 100  |
|         | 5              | *                                        | *    | 100  | 100  | 100  | 100  |
|         | 10             | *                                        | 15   | 100  | 100  | 100  | 100  |
|         | 20             | *                                        | 33   | 100  | 100  | 100  | 100  |



Online Table IX.

| <i>Chromosomal coordinate (hg19)</i> | <i>Gene</i>        | <i>Strand</i> | <i>A1</i> | <i>A2</i> | <i>Res 1</i> | <i>Res 2</i> | <i>rsID</i> | <i>EA MAF (%)</i> | <i>AA MAF (%)</i> | <i>phyloP score</i> | <i>Associated Disease</i>                   |
|--------------------------------------|--------------------|---------------|-----------|-----------|--------------|--------------|-------------|-------------------|-------------------|---------------------|---------------------------------------------|
| chr1:23084586<br>6                   | <i>AGT</i>         | -             | A         | C         | L            | R            | rs5041      | 0.00              | 0.61              | 1.76                | Hypertension                                |
| chr8:14395669<br>3                   | <i>CYP11B</i><br>1 | -             | G         | A         | A            | V            | rs4541      | 1.12              | 3.85              | 1.51                | Adrenal hyperplasia                         |
| chr8:14396110<br>2                   | <i>CYP11B</i><br>1 | -             | C         | T         | R            | Q            | rs4534      | 1.07              | 1.25              | 0.44                | Adrenal hyperplasia                         |
| chr10:1045923<br>67                  | <i>CYP17A</i><br>1 | -             | C         | T         | R            | H            | rs61754278  | 0.00              | 0.36              | 3.98                | Steroid-17 alpha-hydroxylase deficiency     |
| chr10:1045970<br>57                  | <i>CYP17A</i><br>1 | -             | C         | T         | R            | K            | rs61754263  | 0.36              | 0.19              | -0.39               | 17-alpha-hydroxylase/17,20-lyase deficiency |
| chr10:1045971<br>16                  | <i>CYP17A</i><br>1 | -             | C         | G         | M            | I            |             | 0.00              | 0.19              | 5.06                | Steroid-17 alpha-hydroxylase deficiency     |
| chr16:2320092<br>1                   | <i>SCNN1G</i>      | +             | G         | A         | G            | S            | rs5736      | 0.00              | 2.90              | 0.62                | Bronchiectasis                              |
| chr16:2320096<br>3                   | <i>SCNN1G</i>      | +             | G         | A         | E            | K            | rs5738      | 1.44              | 0.36              | 0.97                | Bronchiectasis                              |
| chr16:2336016<br>5                   | <i>SCNN1B</i>      | +             | C         | G         | S            | C            | rs35731153  | 0.18              | 0.00              | 4.29                | Cystic fibrosis, non-classic                |
| chr16:2337928<br>0*                  | <i>SCNN1B</i>      | +             | G         | A         | G            | S            | rs72654338  | 0.19              | 0.00              | 3.99                | Cystic fibrosis, non-classic                |
| chr16:6747000<br>4                   | <i>HSD11B</i><br>2 | +             | G         | A         | R            | H            | rs28934592  | 0.00              | 0.38              | 5.17                | Apparent mineralocorticoid excess           |
| chr17:4093934<br>2                   | <i>WNK4</i>        | +             | G         | A         | R            | H            | rs55997156  | 0.18              | 0.00              | 3.30                | Pseudohypoaldosteronism 2                   |

Online Table X.

|                       |                                                   |                   | EA+AA    |                         |                       |                          |                 |
|-----------------------|---------------------------------------------------|-------------------|----------|-------------------------|-----------------------|--------------------------|-----------------|
| <b>Mutation Class</b> |                                                   | <b># Variants</b> | <b>T</b> | <b>T<sub>mmHg</sub></b> | <b>SE<sub>T</sub></b> | <b>SE<sub>mmHg</sub></b> | <b># In EVS</b> |
| (a)                   | <i>HGMD DMs (111 syndromic patients)</i>          | 91                | 3.568    | 57.1                    | 0.340                 | 5.4                      | 8               |
| (b)                   | <i>HGMD DMs (69 GenNet)</i>                       | 12                | 0.728    | 11.6                    | 0.415                 | 6.6                      | 11              |
| (c)                   | <i>RS&amp;G SNVs (560 GenNet)</i>                 | 2,379             | 0.550    | 8.8                     | 0.019                 | 0.3                      | 808             |
| (d)                   | <i>Deleterious RS&amp;G SNVs (~13K CLUE+FBPP)</i> | 11                | 0.109    | 1.7                     | 0.154                 | 2.5                      | 8               |
| (e)                   | <i>ICBP SNPs (~13K CLUE+FBPP)</i>                 | 27                | 0.014    | 0.2                     | 0.003                 | 0.0                      | -               |

|              |                   | EA        |                         |                       |                          |                 |              | AA        |                         |                       |                          |                 |              |
|--------------|-------------------|-----------|-------------------------|-----------------------|--------------------------|-----------------|--------------|-----------|-------------------------|-----------------------|--------------------------|-----------------|--------------|
| <b>Class</b> | <b># Variants</b> | <b>T</b>  | <b>T<sub>mmHg</sub></b> | <b>SE<sub>T</sub></b> | <b>SE<sub>mmHg</sub></b> | <b># In EVS</b> | <b>q (%)</b> | <b>T</b>  | <b>T<sub>mmHg</sub></b> | <b>SE<sub>T</sub></b> | <b>SE<sub>mmHg</sub></b> | <b># In EVS</b> | <b>q (%)</b> |
| (a)          | 91                | -         | -                       | -                     | -                        | 8               | 0.01         | -         | -                       | -                     | -                        | 8               | 0.03         |
| (b)          | 12                | 0.11<br>7 | 1.9                     | 0.49<br>2             | 7.9                      | 9               | 0.86         | 0.33<br>8 | 5.4                     | 0.16<br>6             | 2.7                      | 8               | 2.32         |
| (c)          | 2,379             | 0.51<br>5 | 8.2                     | 0.01<br>8             | 0.3                      | 419             | 0.05         | 0.51<br>3 | 8.2                     | 0.01<br>9             | 0.3                      | 664             | 1.23         |
| (d)          | 11                | 0.15<br>2 | 2.4                     | 0.16<br>0             | 2.6                      | 8               | 0.09         | 0.17<br>8 | 2.8                     | 0.04<br>3             | 0.7                      | 4               | 0.43         |
| (e)          | 27                | 0.01<br>2 | 0.2                     | 0.00<br>3             | 0.0                      | -               | (!)          | 0.02<br>7 | 0.4                     | 0.00<br>8             | 0.1                      | -               | (!)          |

**Online Figure Legend:**

**Online Figure 1:** Distribution of variants found by RS&G and the 1000 Genomes Project (TGP) for each region that was targeted for resequencing and cumulatively across all genes in EA and AA samples.

Online Figure I.

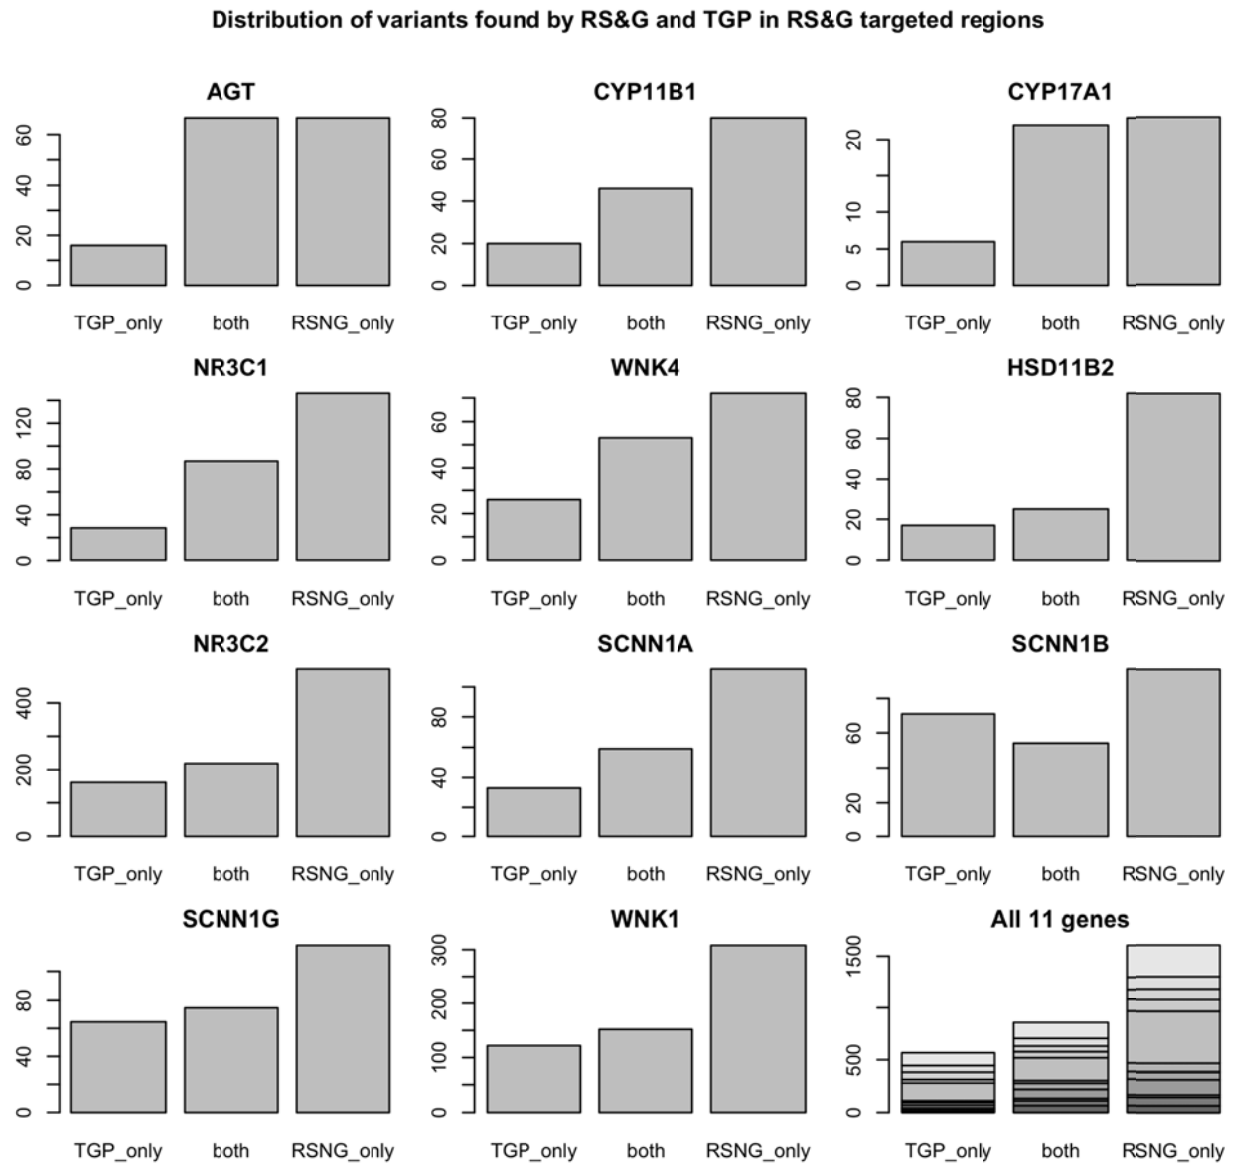

Supplement: NIHMS429677-supplement-supplement_1.pdf [file NIHMS429677-supplement-supplement_1.pdf]
